# Supplementary material
Source: PubMed Central journal article supplement (PMC5522968)
Supplement: mol-23-16_188_Philip_Suppl.pdf [file mol-23-16_188_Philip_Suppl.pdf]

Supplemental Data

Development of a Zebrafish Sepsis Model for High-Throughput Drug Discovery

Anju M Philip,<sup>1,2,3</sup> Youdong Wang,<sup>1,2</sup> Antonio Mauro,<sup>1,2,4,6</sup> Suzan El-Rass,<sup>1,2,4,6</sup> John C Marshall,<sup>1,2,5</sup> Warren L Lee,<sup>1,2,4</sup> Arthur S Slutsky,<sup>1,2,4,5</sup> Claudia C dos Santos,<sup>1,2,4,5</sup> and Xiao-Yan Wen<sup>1,2,3,4,6</sup>

Online address: <http://www.molmed.org>

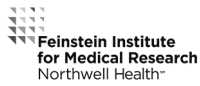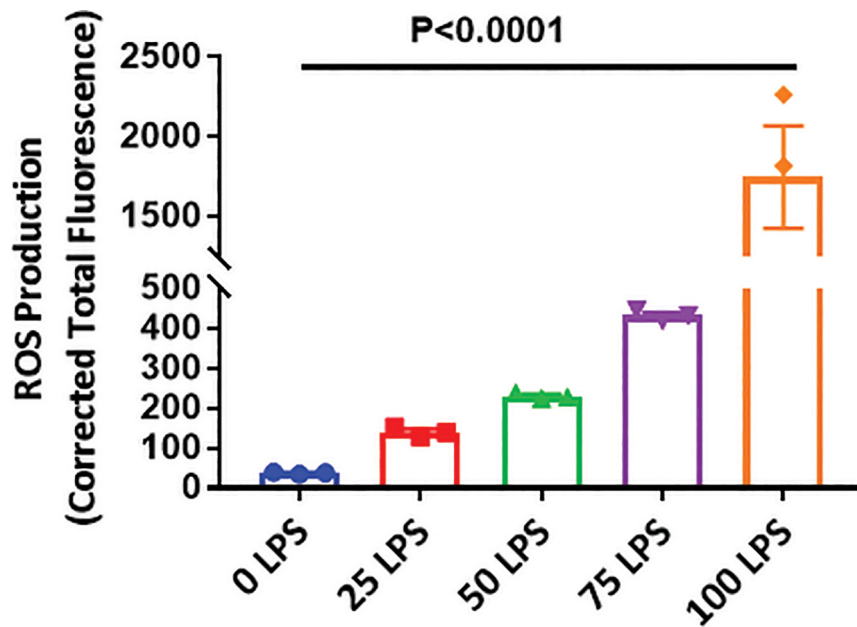

**Supplementary Figure S1.** LPS exposure (25, 50, 75 and 100 µg/mL) significantly increases ROS production in a dose-dependent manner (n = 3/treatment). ROS production was measured using a ROS indicator, namely 2', 7'-dichlorodihydrofluorescein diacetate (DCFH-DA).

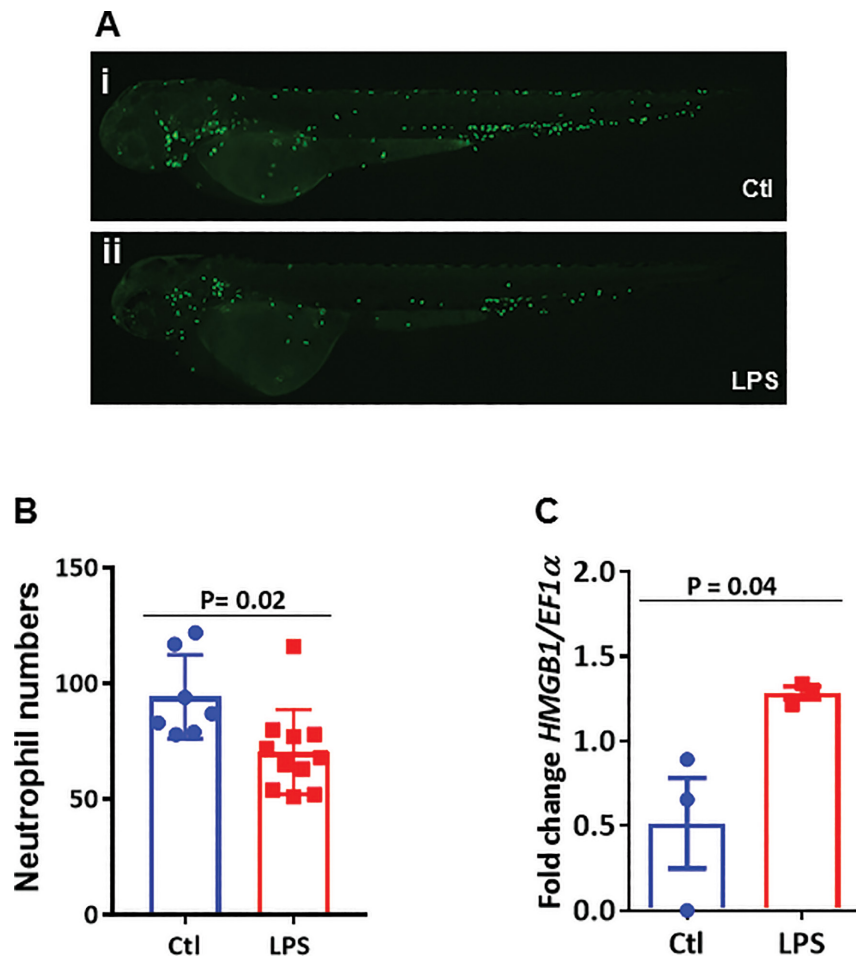

**Supplementary Figure S2.** LPS causes reduced neutrophil numbers and increased HMGB1 expression in the later stages of inflammation in the zebrafish sepsis model. Three DPF zebrafish larvae exposed to LPS (100 µg/mL) showed (A, B) reduced whole-body neutrophil numbers (n = 7–12/treatment) and (C) increased *HMGB1* transcript levels (an average of 3 trials, each with a pool of 20 larvae/treatment) at 6–7 h post LPS treatment when compared with controls.

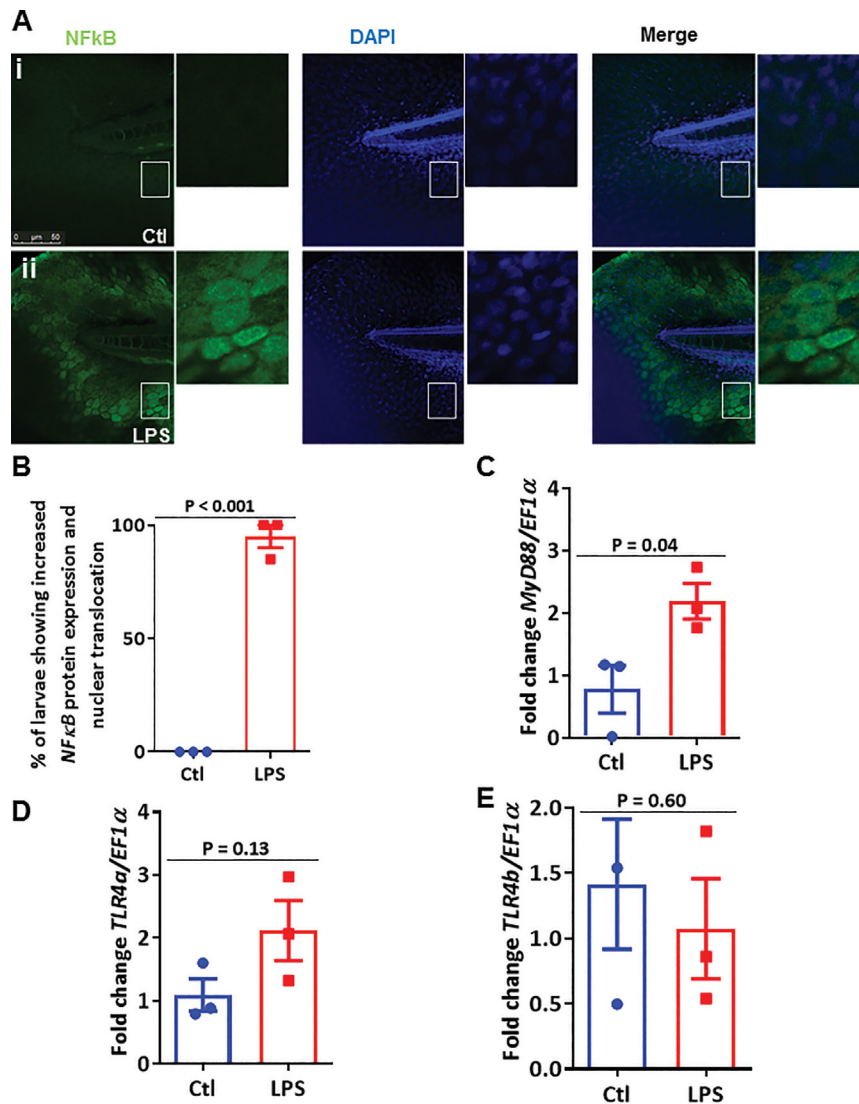

**Supplementary Figure S3.** LPS signaling in the zebrafish sepsis model involves increased NFκB protein synthesis, nuclear NFκB translocation and increased expression of MyD88. Three DPF zebrafish larvae were exposed to LPS for 2 h for immunofluorescence studies and 6 h for quantitative real-time PCR analysis. (A, B) Immunofluorescence microscopy of 3 DPF zebrafish larvae exposed to LPS for 2 h reveals synthesis of NFκB protein and its nuclear translocation (an average of 3 trials with 3–4 larvae/treatment). The larvae were stained with NFκB/p65 rabbit polyclonal primary antibody Alexa fluor 488 secondary antibody and DAPI (nuclear staining) as indicated in the Methods and Materials section. Fluorescence with anti-NFκB/p65 Alexa fluor 488 antibodies and with DAPI and merged fields between the two are shown. Exposure of 3 DPF zebrafish larvae to LPS for 6 h resulted in (C) increased *MyD88* transcript levels, but (D, E) no significant changes in the transcript levels of *TLR4a* and *TLR4b* (an average of 3 trials, each with a pool of 20 larvae/treatment).

ZEBRAFISH MODEL FOR SEPSIS DRUG SCREENS

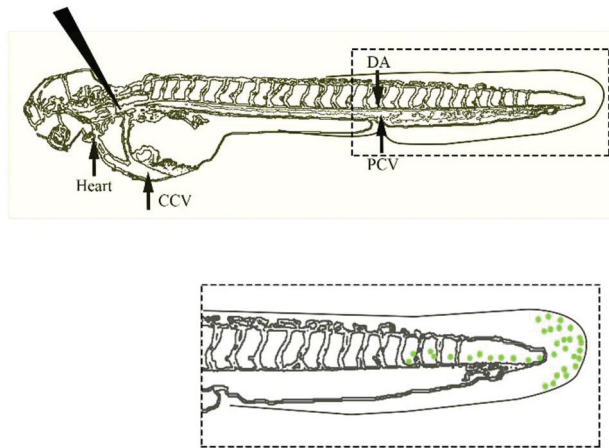

**Supplementary Movie S1.** Time-lapse imaging of LPS-induced vascular leakage through the intersegmental vessels (ISVs). Three DPF zebrafish larvae were exposed to vehicle (top) or LPS (bottom) for 6 h and then injected with FITC-dextran to observe vascular leakage in real time. In the LPS-treated larvae, we can see FITC-dextran leaking out through the last few ISVs, moving toward the tail fin and accumulating at the tip of the tail fin over time. A schematic representation of what is shown in the movie is given above. FITC-dextran is injected into the CCV of zebrafish larvae exposed to vehicle or LPS. In the LPS-treated larvae, we can see the FITC-dextran leaking out through the last few ISVs, moving toward the tail fin and accumulating at the tip of the tail fin over time.
